# Supplementary material
Source: PubMed Central journal article supplement (PMC8059774)
Supplement: NIHMS1664437-supplement-1.pdf [file NIHMS1664437-supplement-1.pdf]

## **ONLINE SUPPLEMENT**

### **Effect of a Quality Improvement Intervention for Acute Heart Failure in India: An Interrupted Time Series Study**

Anubha Agarwal MD MSc, Padinhare P. Mohanan MD DM, Dimple Kondal PhD, Abigail Baldrige MS, Divin Davies BA, Raji Devarajan MS, Govindan Unni MD DM, Jabir Abdullakutty MD DM, Syam Natesan MD DM, Johny Joseph MD DM, Pathiyil B. Jayagopal MD DM, Stigi Joseph MD DM, Rajesh Gopinath MD DM, Mark D. Huffman MD MPH, Dorairaj Prabhakaran MD DM MSc

**Online Figure 1.** Flowchart of participants

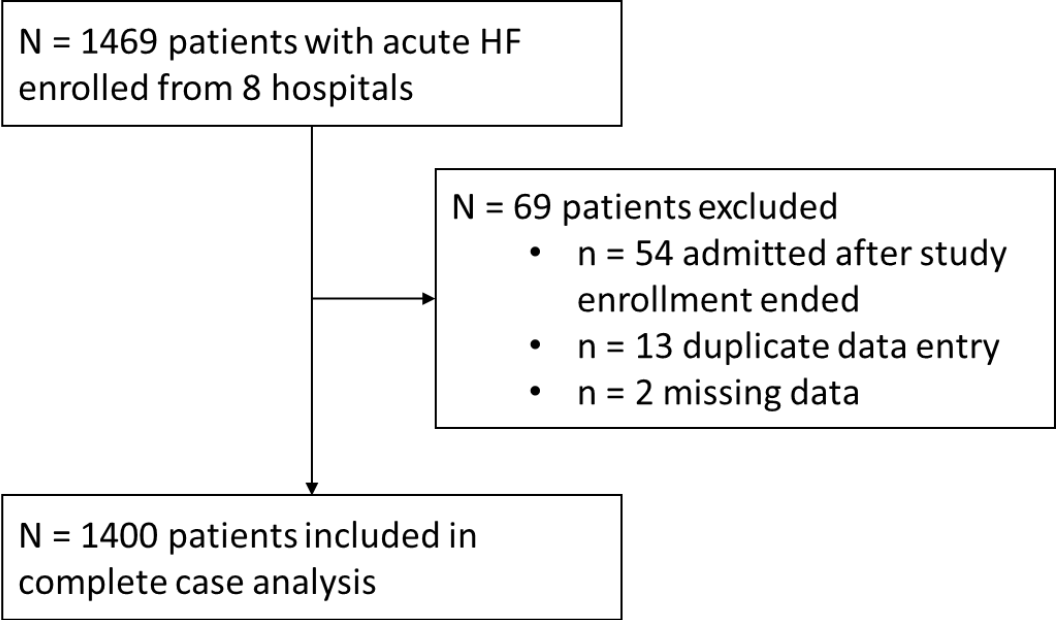

**Online Table 1.** Characteristics of participating hospitals in HF QUIK.

| <b>Hospital characteristics</b>                   | <b>Hospital number = 8</b> |
|---------------------------------------------------|----------------------------|
| Type, No. (%)                                     |                            |
| Government                                        | 1 (12.5)                   |
| Nonprofit/charity                                 | 3 (37.5)                   |
| Private                                           | 4 (50.0)                   |
| NABH accreditation, No. (%)                       | 3 (37.5)                   |
| Teaching hospital, No. (%)                        | 5 (62.5)                   |
| Staff cardiologists, median (IQR)                 | 4 (2.8 - 4.3)              |
| Intensive care unit, No. (%)                      | 8 (100.0)                  |
| Catheterization lab, No. (%)                      | 7 (87.5)                   |
| Size, No. (%)                                     |                            |
| ≥1000 hospital beds                               | 1 (12.5)                   |
| 500-999 hospital beds                             | 4 (50.0)                   |
| ≤499 hospital beds                                | 3 (37.5)                   |
| Heart-failure specific outpatient clinic, No. (%) | 3 (37.5)                   |

NABH: National Accreditation Board for Hospitals & Healthcare Providers

**Online Table 2.** Temporal trends models for guideline-directed medical therapy among patients with HFrEF.

| Covariate        | OR (95% CI) <sup>1</sup> |                      |                               |                                       |
|------------------|--------------------------|----------------------|-------------------------------|---------------------------------------|
|                  | Unadjusted               | Age and sex adjusted | Primary analysis <sup>2</sup> | MAGGIC adjusted analysis <sup>3</sup> |
| Intervention     | 0.93 (0.52, 1.66)        | 0.95 (0.53, 1.69)    | 0.93 (0.45, 1.94)             | 0.81 (0.36, 1.80)                     |
| Week             | 1.05 (1.01, 1.10)        | 1.05 (1.01, 1.10)    | 1.05 (0.997, 1.11)            | 1.07 (1.01, 1.13)                     |
| Age              | -                        | 1.00 (0.98, 1.01)    | 1.00 (0.98, 1.02)             | 1.01 (0.99, 1.03)                     |
| Female           | -                        | 1.27 (0.94, 1.72)    | 1.08 (0.73, 1.59)             | 0.69 (0.44, 1.06)                     |
| LVEF             | -                        | -                    | -                             | 1.01 (0.97, 1.05)                     |
| Serum creatinine | -                        | -                    | -                             | 0.22 (0.14, 0.34)                     |
| Diabetes         | -                        | -                    | -                             | 1.41 (0.93, 2.12)                     |

<sup>1</sup>Among participants discharged with LVEF <40%; N = 846 with 442 in control period and 404 in intervention period.

<sup>2</sup>Primary analysis models include adjustment for age and sex as well as a random cluster effect for hospital.

<sup>3</sup>Adjusted for age, sex, random cluster effect for hospital, and MAGGIC risk predictors including ejection fraction, serum creatinine, and diabetes mellitus.

**Online Table 3.** Assessment for form of temporal trends models for rate of guideline-directed medical therapy among patients with HF/rEF.

| Covariate    | No Trend <sup>1</sup> |                | Basic <sup>2</sup>  |                | Intervention Dependent Trend <sup>3</sup> |                | Quadratic Trend <sup>4</sup> |                |
|--------------|-----------------------|----------------|---------------------|----------------|-------------------------------------------|----------------|------------------------------|----------------|
|              | Beta (95% CI)         | R <sup>2</sup> | Beta (95% CI)       | R <sup>2</sup> | Beta (95% CI)                             | R <sup>2</sup> | Beta (95% CI)                | R <sup>2</sup> |
| Intervention | 14.10 (20.49, 34.54)  | 0.26           | 1.18 (18.18, 20.55) | 0.34           | 46.90 (16.36, 77.44)                      | 0.58           | 1.18 (-13.67, 17.58)         | 0.63           |
| Week         |                       |                | 0.99 (-.30, 2.28)   |                |                                           |                | 4.69 (2.60, 6.79)            |                |
| Week 1-13    |                       |                |                     |                | 2.82 (1.34, 4.30)                         |                |                              |                |
| Week 14-26   |                       |                |                     |                | -0.84 (-2.32, 0.65)                       |                |                              |                |
| Week * Week  |                       |                |                     |                |                                           |                | -0.15 (-0.22, -0.07)         |                |

<sup>1</sup>Outcome = Intercept + B<sub>1</sub>\*Intervention (0/1)

<sup>2</sup>Outcome = Intercept + B<sub>1</sub>\*Intervention (0/1) + B<sub>2</sub> \* Week (1-26)

<sup>3</sup>Outcome = Intercept + B<sub>1</sub>\*Intervention (0/1) + B<sub>2</sub> \* Week (1-13) + B<sub>3</sub> \* Week (14-26)

<sup>4</sup>Outcome = Intercept + B<sub>1</sub>\*Intervention (0/1) + B<sub>2</sub> \* Week (1-26) \* Week (1-26)

## HEART FAILURE QUALITY IMPROVEMENT IN KERALA

### Audit-and-feedback performance report

Hospital name:

Report date:

Performance period:

Total number of participants enrolled over performance period:

### PROCESS MEASURES

| In-hospital measure          | Current period | Previous period |
|------------------------------|----------------|-----------------|
| ECG                          |                |                 |
| BNP or NT pro-BNP            |                |                 |
| Transthoracic echocardiogram |                |                 |

| Discharge measure                                                                                           | Current period | Previous period |
|-------------------------------------------------------------------------------------------------------------|----------------|-----------------|
| Prescription of diuretic for symptoms of volume overload                                                    |                |                 |
| Prescription of ACE inhibitor or ARB or ARNI in patients with LVEF $\leq$ 35% and without contraindications |                |                 |
| Prescription of beta-blocker in patients with LVEF $\leq$ 35% and without contraindications                 |                |                 |
| Prescription of aldosterone antagonist in patients with LVEF $\leq$ 35% and without contraindications       |                |                 |
| Prescription of aspirin in eligible patients and without contraindications                                  |                |                 |
| Prescription of statin in eligible patients and without contraindications                                   |                |                 |
| Tobacco cessation counseling                                                                                |                |                 |
| Alcohol cessation counseling                                                                                |                |                 |
| Diet counseling                                                                                             |                |                 |
| Home weight monitoring instructions                                                                         |                |                 |
| Prescription of ICD or CRT or CRT-D therapy in patients with LVEF $\leq$ 35%                                |                |                 |
| Referral for outpatient cardiac rehabilitation                                                              |                |                 |
| Outpatient department follow-up scheduled                                                                   |                |                 |

### OUTCOME MEASURES

| In-hospital measure   | Current period | Previous period |
|-----------------------|----------------|-----------------|
| In-hospital mortality |                |                 |

GOAL FOR NEXT PERIOD: \_\_\_\_\_
